# Supplementary material
Source: MDPI journal article supplement (https://www.mdpi.com/2076-3417/13/6/3602)
Supplement: s1 [file s1]

**Table S1.** Analysis of Variance of the model (Response surface methodology with a Box- Behnken design) for Ag leaching from (a) m-Si and (b) p-Si waste panel.

| <i>(a)Analysis of Variance (m-Si)</i> | <i>DF</i> | <i>Adj SS</i> | <i>Adj MS</i> | <i>F-Value</i> | <i>P-Value</i> |
|---------------------------------------|-----------|---------------|---------------|----------------|----------------|
| Model                                 | 14        | 15647933      | 1117709       | 4,20           | 0,009          |
| Linear                                | 4         | 11730171      | 2932543       | 11,01          | 0,001          |
| HNO3                                  | 1         | 3326842       | 3326842       | 12,49          | 0,004          |
| Time                                  | 1         | 6014084       | 6014084       | 22,58          | 0,000          |
| Temperature                           | 1         | 765697        | 765697        | 2,87           | 0,116          |
| L/S                                   | 1         | 1623548       | 1623548       | 6,09           | 0,030          |
| Square                                | 4         | 1678834       | 419709        | 1,58           | 0,244          |
| HNO3*HNO3                             | 1         | 567900        | 567900        | 2,13           | 0,170          |
| Time*Time                             | 1         | 170053        | 170053        | 0,64           | 0,440          |
| Temperature*Temperature               | 1         | 105658        | 105658        | 0,40           | 0,541          |
| L/S*L/S                               | 1         | 631262        | 631262        | 2,37           | 0,150          |
| 2-Way Interaction                     | 6         | 2238927       | 373155        | 1,40           | 0,291          |
| HNO3*Time                             | 1         | 562021        | 562021        | 2,11           | 0,172          |
| HNO3*Temperature                      | 1         | 48457         | 48457         | 0,18           | 0,677          |
| HNO3*L/S                              | 1         | 353885        | 353885        | 1,33           | 0,272          |
| Time*Temperature                      | 1         | 748129        | 748129        | 2,81           | 0,120          |
| Time*L/S                              | 1         | 511250        | 511250        | 1,92           | 0,191          |
| Temperature*L/S                       | 1         | 15184         | 15184         | 0,06           | 0,815          |
| Error                                 | 12        | 3196596       | 266383        |                |                |
| Lack-of-Fit                           | 10        | 1565594       | 156559        | 0,19           | 0,972          |
| <i>(b)Analysis of Variance (p-Si)</i> | <i>DF</i> | <i>Adj SS</i> | <i>Adj MS</i> | <i>F-Value</i> | <i>P-Value</i> |
| Model                                 | 14        | 8625209       | 616086        | 5,1            | 0,004          |
| Linear                                | 4         | 6024329       | 1506082       | 12,48          | 0              |
| HNO3                                  | 1         | 1668330       | 1668330       | 13,82          | 0,003          |
| Time                                  | 1         | 3189906       | 3189906       | 26,42          | 0              |
| Temperature                           | 1         | 552595        | 552595        | 4,58           | 0,054          |
| L/S                                   | 1         | 613498        | 613498        | 5,08           | 0,044          |
| Square                                | 4         | 1114108       | 278527        | 2,31           | 0,118          |
| HNO3*HNO3                             | 1         | 444487        | 444487        | 3,68           | 0,079          |
| Time*Time                             | 1         | 236774        | 236774        | 1,96           | 0,187          |
| Temperature*Temperature               | 1         | 31579         | 31579         | 0,26           | 0,618          |
| L/S*L/S                               | 1         | 108665        | 108665        | 0,9            | 0,361          |
| 2-Way Interaction                     | 6         | 1486771       | 247795        | 2,05           | 0,136          |
| HNO3*Time                             | 1         | 193108        | 193108        | 1,6            | 0,23           |
| HNO3*Temperature                      | 1         | 152028        | 152028        | 1,26           | 0,284          |
| HNO3*L/S                              | 1         | 335452        | 335452        | 2,78           | 0,121          |
| Time*Temperature                      | 1         | 315618        | 315618        | 2,61           | 0,132          |
| Time*L/S                              | 1         | 171747        | 171747        | 1,42           | 0,256          |
| Temperature*L/S                       | 1         | 318818        | 318818        | 2,64           | 0,13           |
| Error                                 | 12        | 1448598       | 120716        |                |                |
| Lack-of-Fit                           | 10        | 739026        | 73903         | 0,21           | 0,965          |
| Pure Error                            | 2         | 709571        | 354786        |                |                |
| Total                                 | 26        | 10073806      |               |                |                |

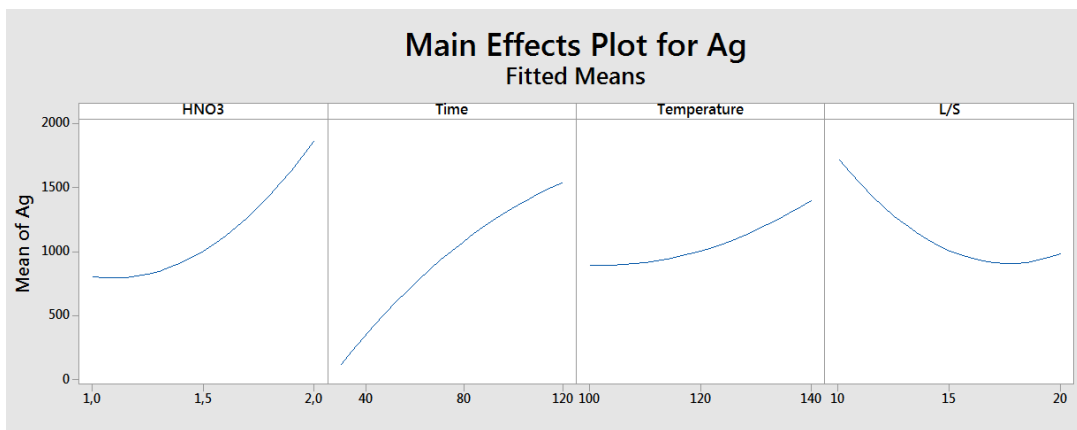

(a) m-Si panel

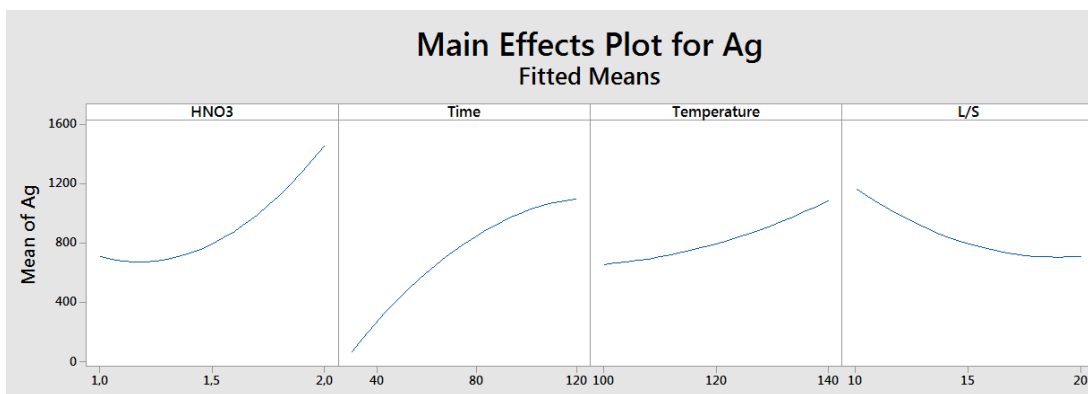

(b) p-Si panel

**Figure. S1.** The main effects plot for the parameters HNO<sub>3</sub>, Time, Temperature and S/L ratio on Ag leaching from (a) m-Si and (b) p-Si waste panel.

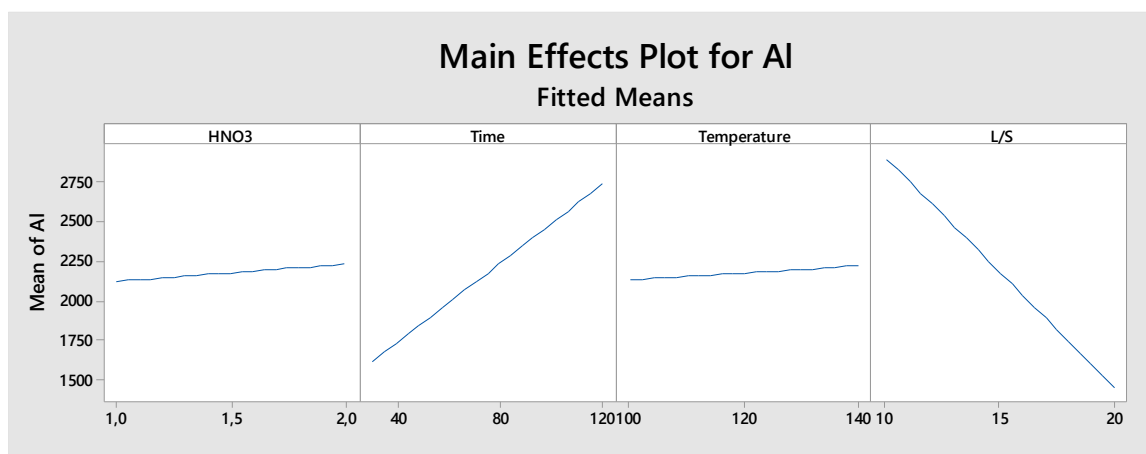

**Figure. S2.** The main effects plot for the parameters HNO<sub>3</sub>, Time, Temperature and S/L ratio on Al leaching from m-Si waste panel.

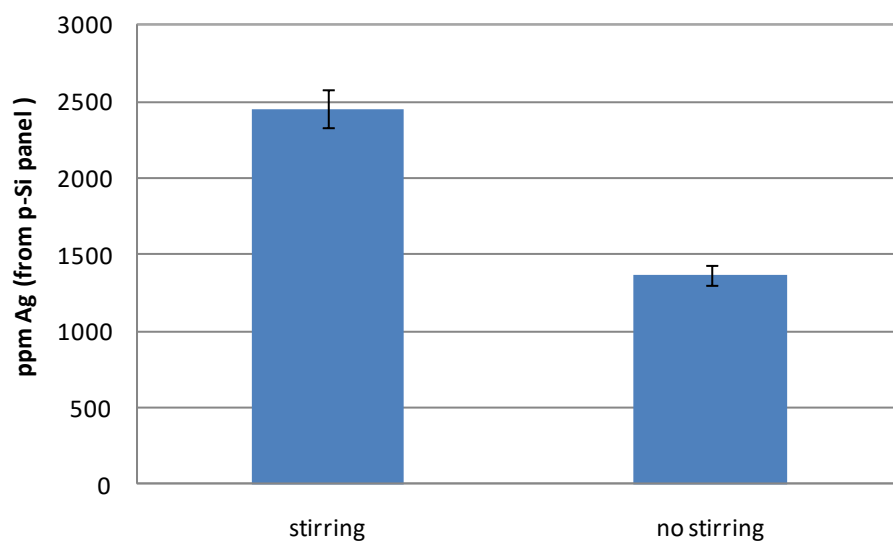

**Figure. S3.** The effect of stirring on Ag leaching ( p-Si panel, HNO<sub>3</sub> 2N, S/L=1/10, 2 h, 45 °C).

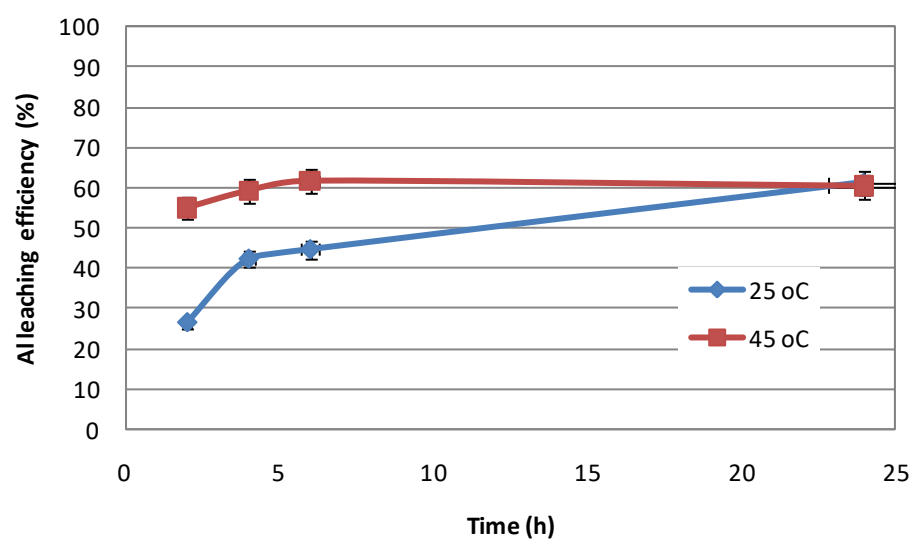

**Figure. S4.** The effect of temperature on Al leaching (m-Si panel,  $\text{HNO}_3$  2N, S/L=1/10).

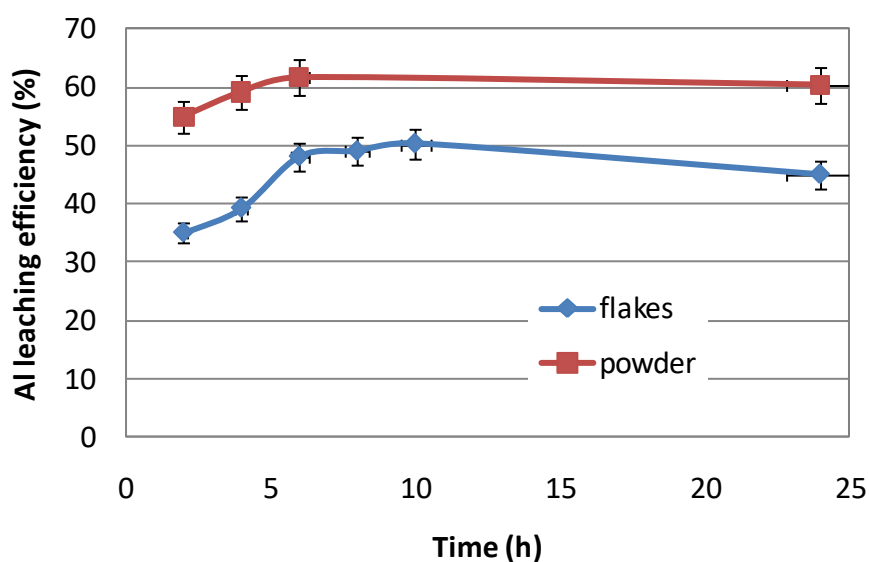

**Figure. S5.** The effect of milling on Al leaching ( m-S panel,  $\text{HNO}_3$  2N, S/L=1/10, 45 °C).
